# Supplementary material for: Strong enhancement of gold nanoparticle chemiresistor response to low-partitioning organic analytes induced by pre-exposure to high partitioning organics
Source: Royal Society of Chemistry journal article supplement (doi:10.1039/c9cp06849j), 2020-01-01
Supplement: c9cp06849j1.pdf [file c9cp06849j1.pdf]

Supplementary Information:

Enhanced gold nanoparticle chemiresistor response to  
low-partitioning organic analytes induced by pre-exposure  
to high partitioning organics

Karl-Heinz Müller, Nereus Patel, Lee J. Hubble, James S. Cooper and Edith Chow  
*CSIRO Manufacturing, Lindfield, NSW, 2070, Australia*

## Limit of Detection

Using the octane pre-exposure method to enhance the gold nanoparticle film chemiresistor response only works for analytes with sufficiently small  $P$ . For the current enhancement factor  $F$  to be greater than 1, for small analyte concentration  $c_m$ , one obtains the following constraint on  $P_m$

$$P_m(0) + P_m(1) < c_o P_o(0) [\ln P_o(0) - \ln P_o(1)] . \quad (15)$$

With a maximum assumed value of  $c_o P_o(0) \approx 0.3$ , one finds

$$P_m(0) + P_m(c_o) \lesssim 2.3 . \quad (16)$$

Therefore, in order for the pre-exposure method to work, the analyte partition coefficient has to be sufficiently small.

The question then arises as to what is the minimum detectable analyte concentration  $c_m$ ?

Without pre-exposure to octane, *i.e.*  $c_o = 0$ , the gold nanoparticle chemiresistor current response to a small analyte concentration is (from Eq. (12))

$$\frac{\Delta I}{I}|_{c_o=0} = -\beta L c_m P_m(0) . \quad (17)$$

With pre-exposure to octane, *i.e.*  $c_o \neq 0$ , the chemiresistor current response is obtained by multiplying the right hand side of Eq. (17) by  $F(c_m \rightarrow 0)$  of Eq. (12). One obtains

$$\frac{\Delta I}{I}|_{c_o \neq 0} = \beta L_0 c_m [c_o P_o(0) (\ln P_o(0) - \ln P_o(1)) - P_m(c_o)] . \quad (18)$$

It is important to note that in contrast to Eq. (17), Eq. (18) is no longer proportional to  $P_m(0)$ . Assuming  $\beta L = 10$ ,  $P_m(c_o) \ll 1$  and that the experimental instrumentation has at best a current resolution of  $10^{-5}$ , one finds in the case of 2 ppm octane pre-exposure  $c_o P_o(0) \approx 0.057$  and thus the minimal detectable analyte concentration is

$$(c_m)_{min} \approx 2.3 \text{ ppm} . \quad (19)$$

This is a number which is essentially independent of the kind of analyte as long as  $P_m(c_o) \ll 1$ . In contrast, in the case of methanol with  $P_m(0) = 0.01$ , without pre-exposure to octane, using Eq. (19), one would only achieve a detection limit  $(c_m)_{min} \approx 100$  ppm.
